# Supplementary material for: Highly electron-deficient ultrathin Co nanosheets supported on mesoporous Cr2O3 for catalytic hydrogen evolution from ammonia borane
Source: Royal Society of Chemistry journal article supplement (doi:10.1039/d3nr03867j), 2023-01-01
Supplement: d3nr03867j1.pdf [file d3nr03867j1.pdf]

**Highly electron-deficient ultrathin Co nanosheets supported on mesoporous  
Cr<sub>2</sub>O<sub>3</sub> for catalytic hydrogen evolution from ammonia borane**

Jin Song<sup>a</sup> and Fenglong Wu<sup>\*a</sup>

<sup>a</sup> Department of Chemical and Environmental Engineering, Hetao College, Bayan Nur  
015000, China

E-mail: wufenglong1983@126.com

### Calculation method of TOF value

The TOF value is calculated by the following equation.

$$TOF = \frac{3n_{NH_3BH_3}}{n_{metal}t}$$

In this equation,  $n_{metal}$  means the total molar amount of Co species on the surface of  $Cr_2O_3$ ,  $t$  means the hydrogen evolution time, and  $n_{NH_3BH_3}$  means the molar amount of  $NH_3BH_3$  introduced in the system.

### Support preparation

Preparation Of  $C_3N_4$ : 4.99g urea were milled into powder and placed in muffle furnace 500 °C for 2h.

Preparation Of  $WO_3$ :  $WO_3$  nanoparticles were prepared based on literature.<sup>1</sup> Specifically,  $WCl_6$  (1.029g) and hexamethylenetetramine (0.1728g) was dissolved in 30mL n-butanol solution. After that the above solution was placed into autoclave and kept at 160 °C for 24 h. The obtained samples were washed with high purity water and absolute ethanol for several times and then heated at 70 °C for 10 h. Finally, the samples were calcined in muffle furnace at 500 °C for 2 h.

Preparation Of  $MoO_3$ : 0.99g ammonium molybdate tetrahydrate ( $H_2MoN_6O_{24} \cdot 4H_2O$ ) were placed in muffle furnace 600 °C for 2h.

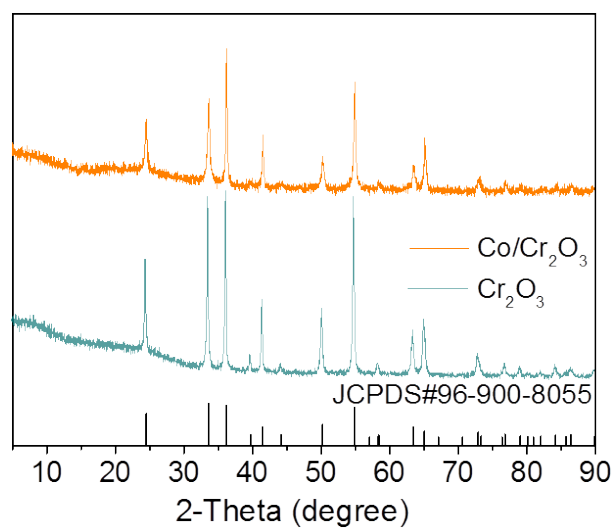

**Fig. S1** XRD patterns of samples.

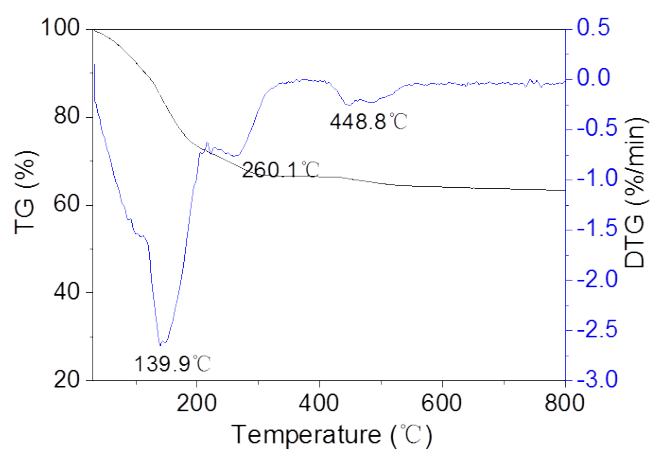

**Fig. S2** TGA and DTG of the precursor sample of mesoporous Cr<sub>2</sub>O<sub>3</sub>.

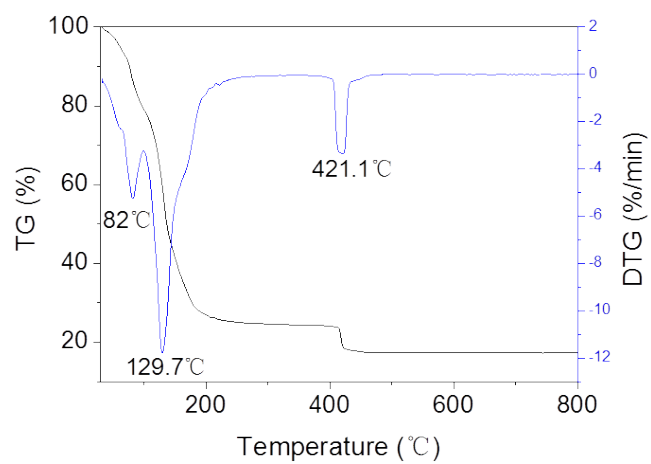

**Fig. S3** TGA and DTG of the precursor sample of  $\text{Cr}_2\text{O}_3$ .

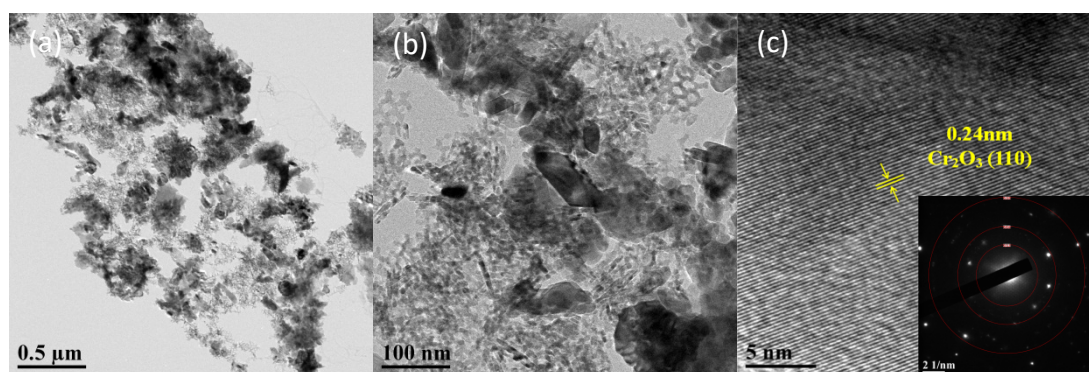

**Fig S4** TEM and HRTEM images of  $\text{Cr}_2\text{O}_3$ .

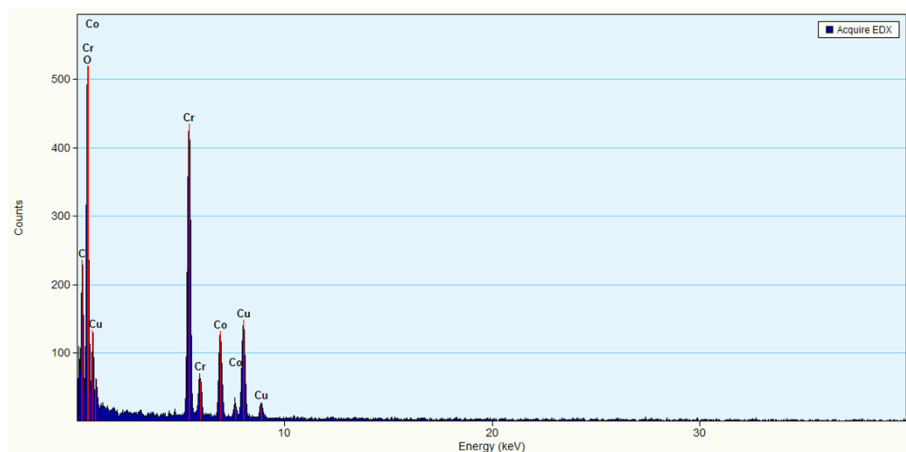

**Fig. S5** EDS of Co/Cr<sub>2</sub>O<sub>3</sub>.

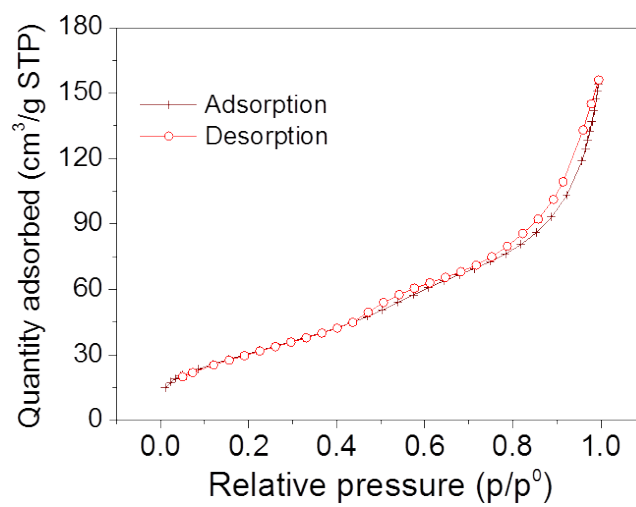

**Fig. S6** N<sub>2</sub> adsorption-desorption isotherms of Co/Cr<sub>2</sub>O<sub>3</sub>.

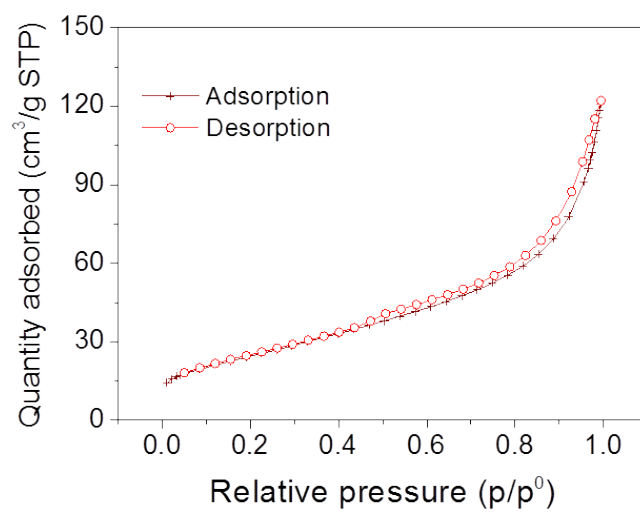

**Fig. S7**  $\text{N}_2$  adsorption-desorption isotherms of mesoporous  $\text{Cr}_2\text{O}_3$ .

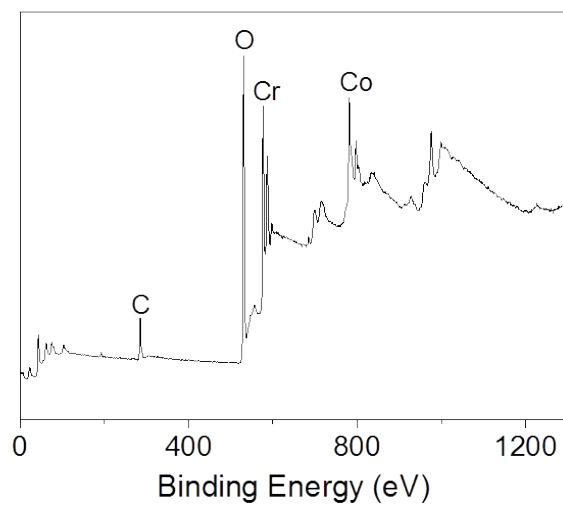

**Fig. S8** XPS spectra for  $\text{Co}/\text{Cr}_2\text{O}_3$ .

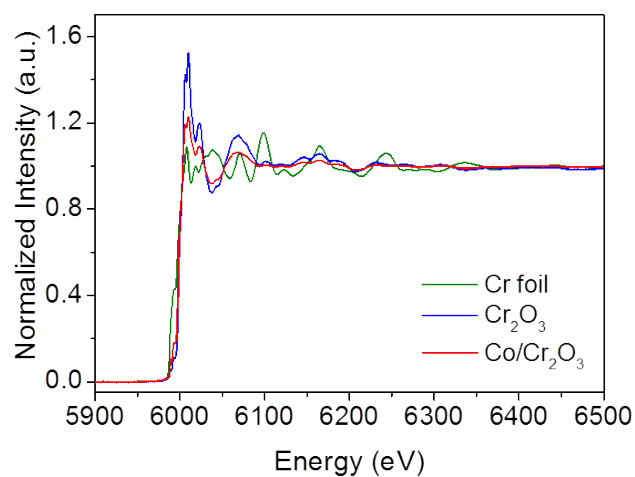

**Fig. S9** Normalized XANES spectra of Cr foil, Cr<sub>2</sub>O<sub>3</sub>, and Co/Cr<sub>2</sub>O<sub>3</sub> at the Cr K-edge.

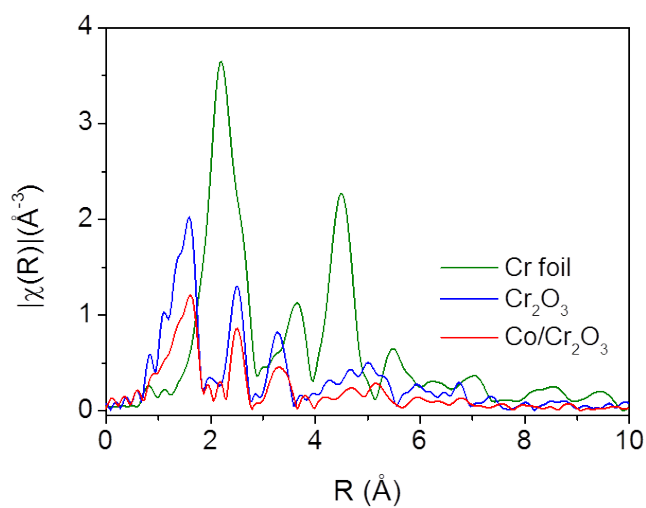

**Fig. S10** Fourier transform EXAFS spectra of Cr foil, Cr<sub>2</sub>O<sub>3</sub>, and Co/Cr<sub>2</sub>O<sub>3</sub> at the Cr K-edge.

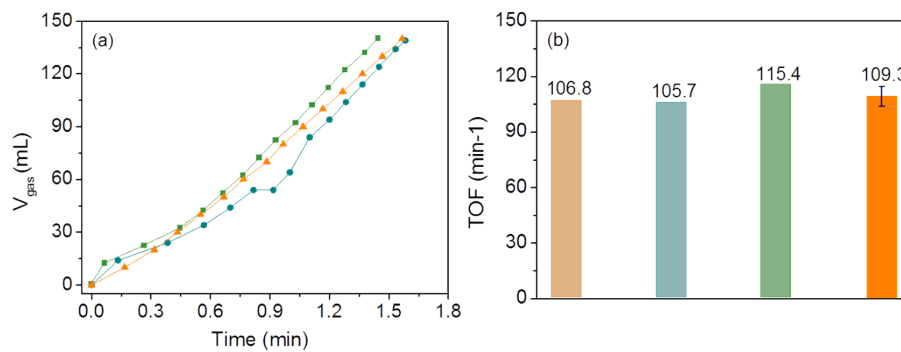

**Fig. S11** Plots of time versus volume of  $\text{H}_2$  evolution from  $\text{NH}_3\text{BH}_3$  in the aqueous solution over  $\text{Co/Cr}_2\text{O}_3$  under visible light irradiation, (b) TOF value and corresponding error bar.

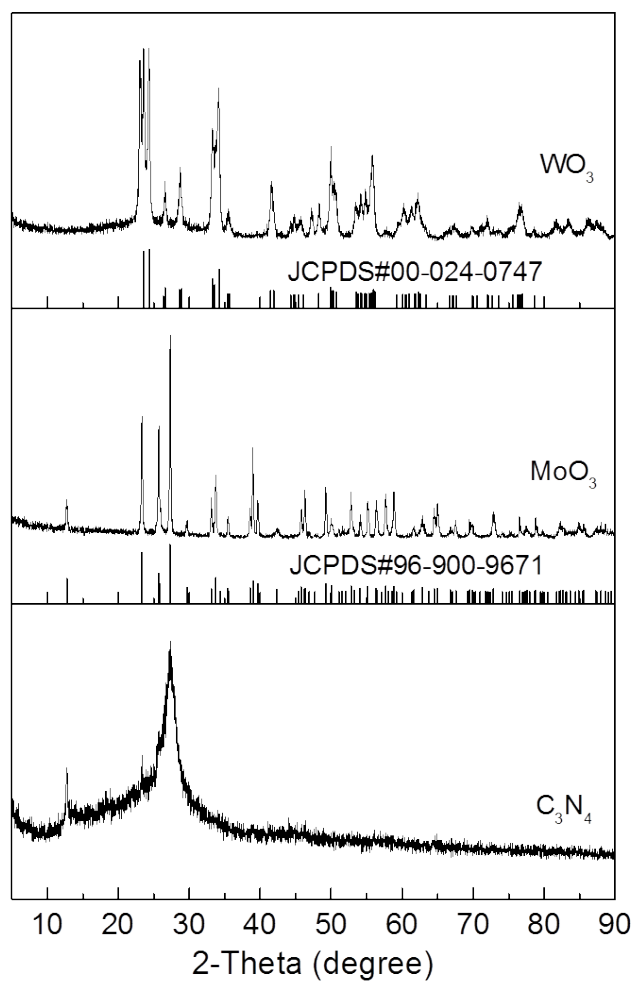

**Fig. S12** XRD patterns of samples.



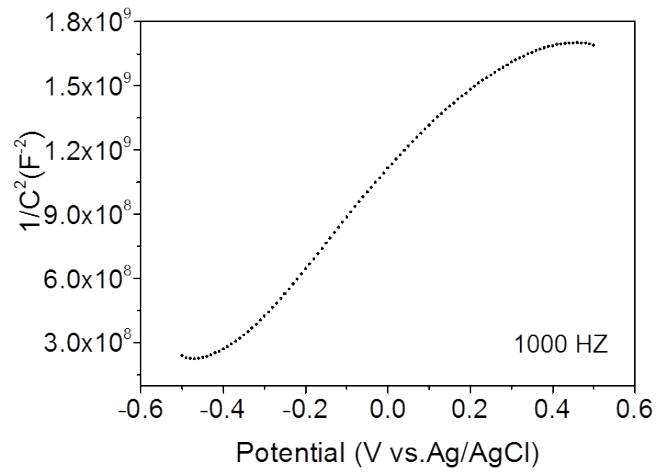

**Fig. S13** Mott-Schottky plots of C<sub>3</sub>N<sub>4</sub>.

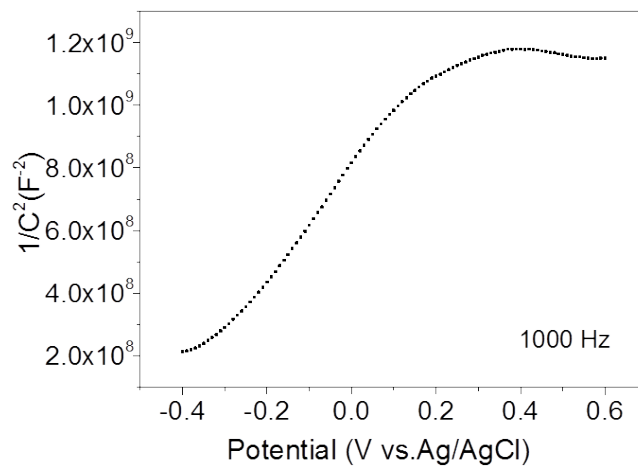

**Fig. S14** Mott-Schottky plots of MoO<sub>3</sub>.

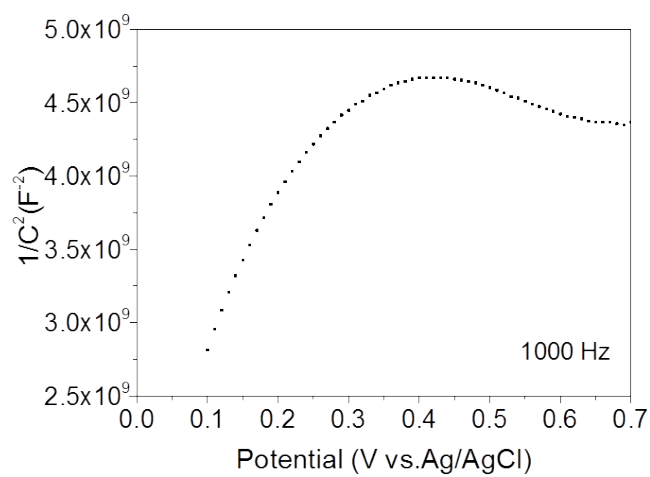

**Fig. S15** Mott-Schottky plots of WO<sub>3</sub>.

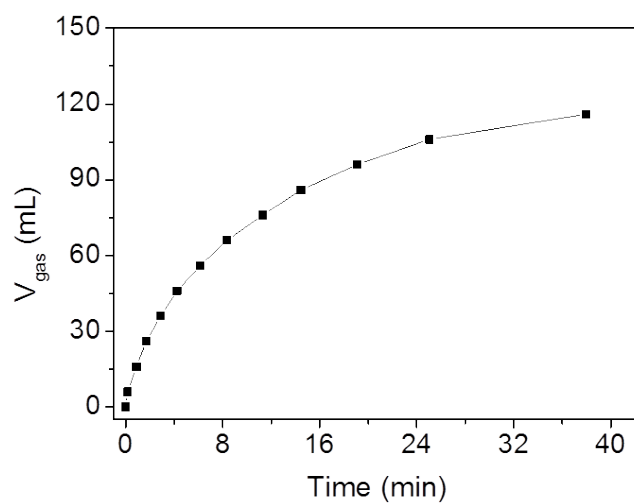

**Fig. S16** Plots of time versus volume of H<sub>2</sub> evolution from NH<sub>3</sub>BH<sub>3</sub> in the aqueous solution over Co/MoO<sub>3</sub> in dark.

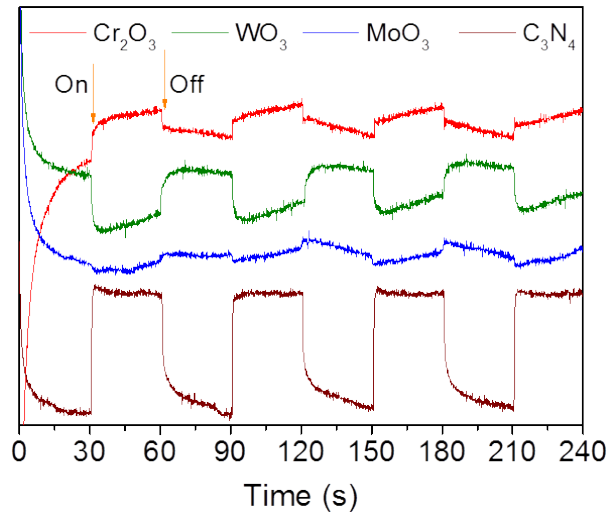

**Fig. S17** Profiles of time versus transient photocurrent density of the samples.

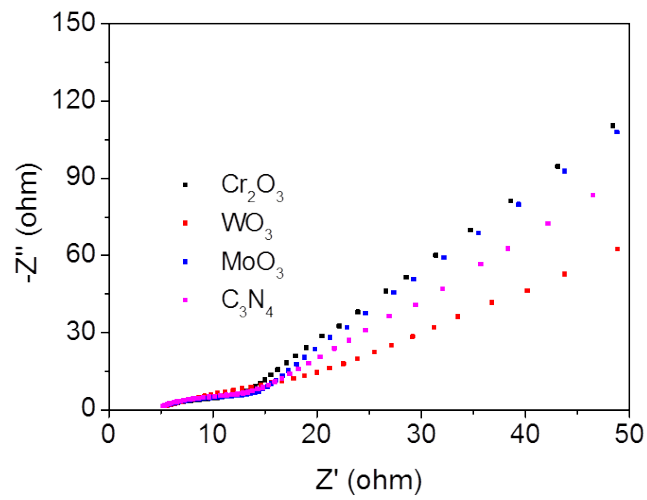

**Fig. S18** EIS Nyquist plots of samples.

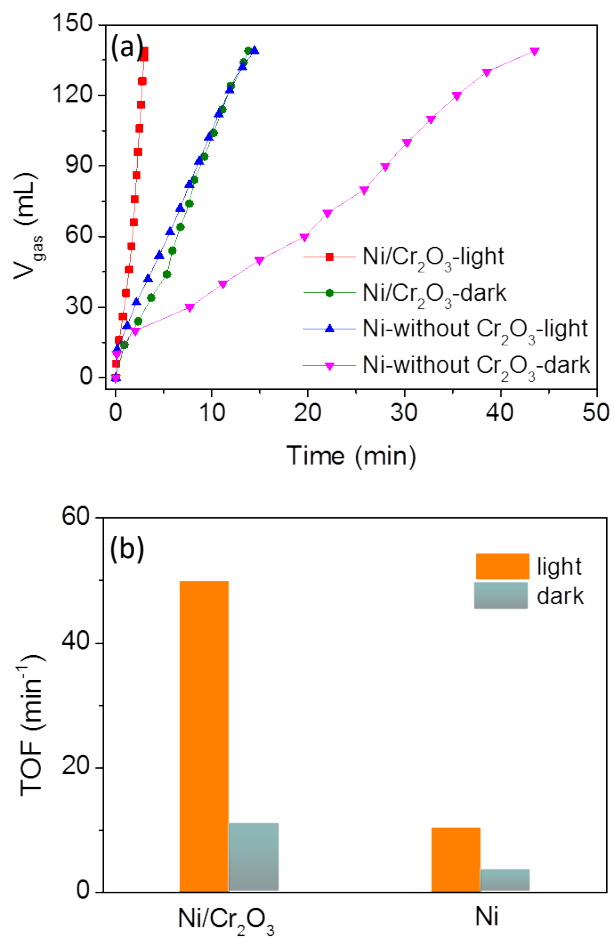

**Fig. S19** (a) Plots of time versus volume of H<sub>2</sub> evolution from NH<sub>3</sub>BH<sub>3</sub> in the aqueous solution over Ni-based catalysts in dark and under visible light irradiation, (b) corresponding TOF value.

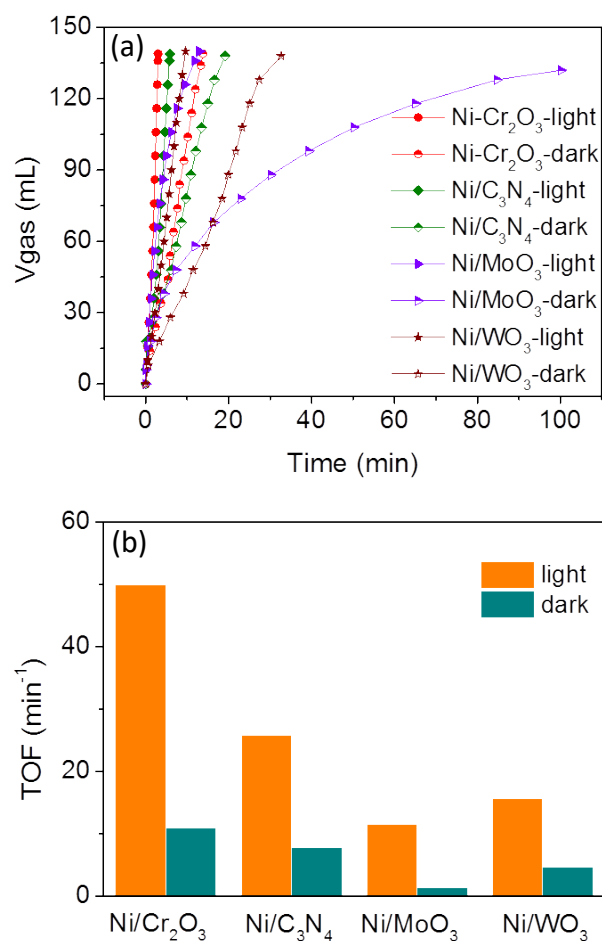

**Fig. S20** (a) Plots of time versus volume of H<sub>2</sub> evolution from NH<sub>3</sub>BH<sub>3</sub> in the aqueous solution over Ni-based catalysts with photoactive semiconductor as support in dark and under visible light irradiation, (b) corresponding TOF value.

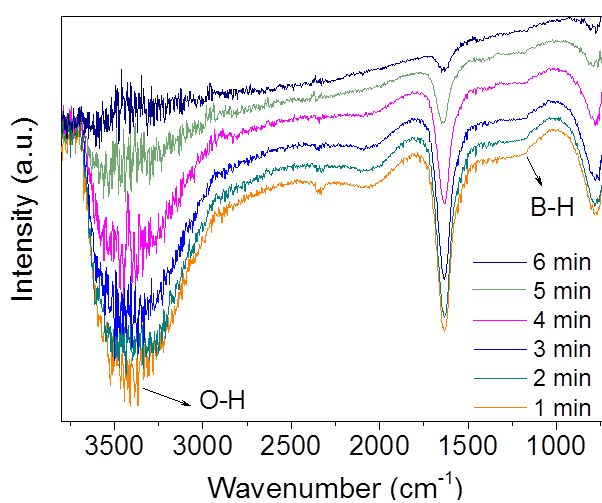

**Fig. S21** The time evolutions of the DRIFTS spectra of NH<sub>3</sub>BH<sub>3</sub> hydrolysis over Co/Cr<sub>2</sub>O<sub>3</sub> catalyst

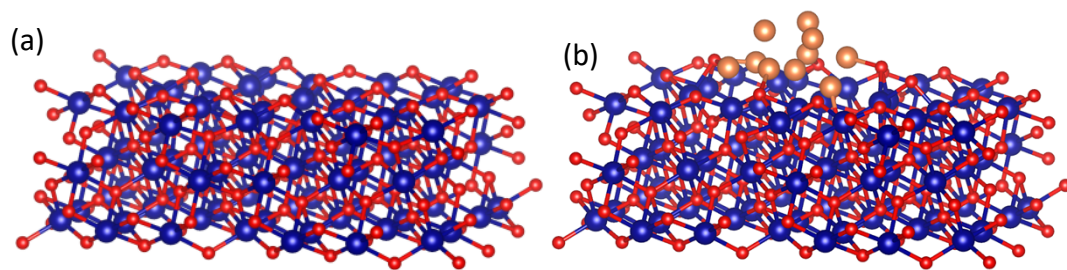

**Fig. S22** Clean surface of (a)  $\text{Cr}_2\text{O}_3$  and (b)  $\text{Co}/\text{Cr}_2\text{O}_3$ .

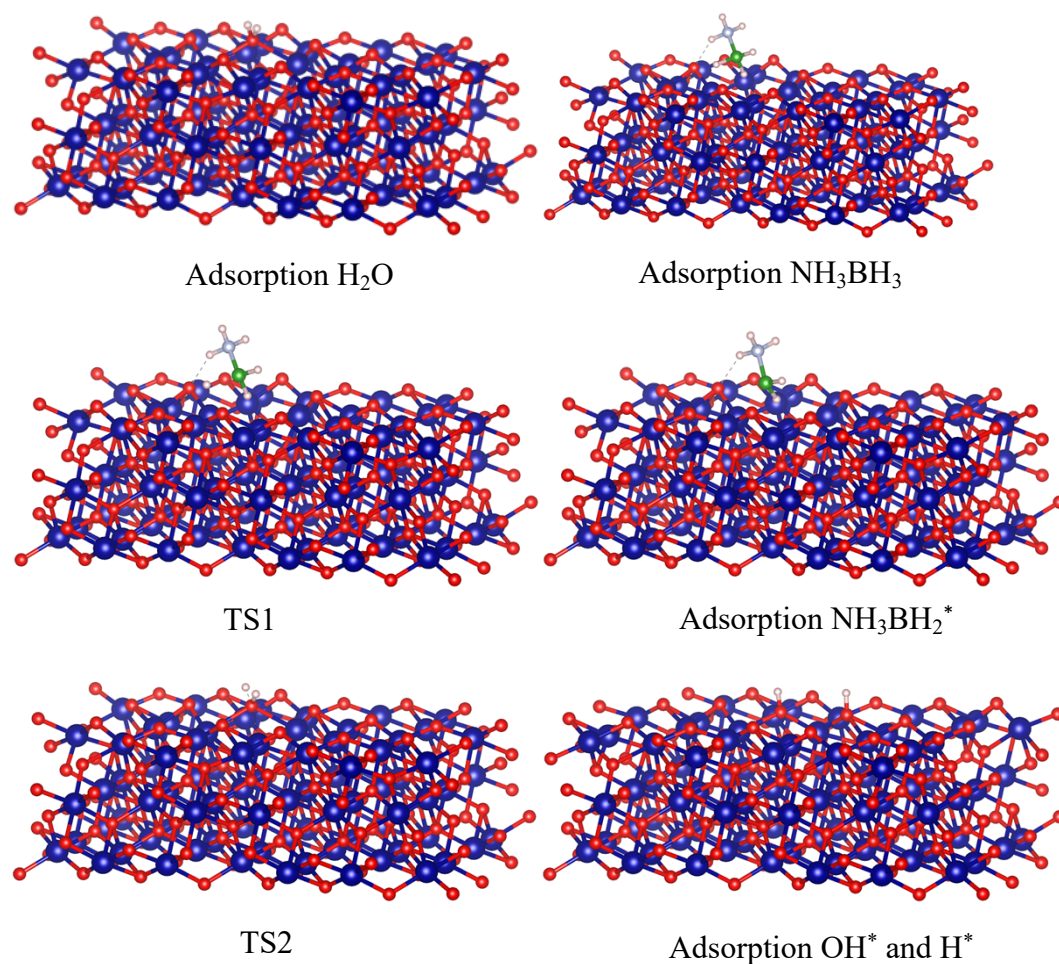

**Fig. S23** DFT calculated intermediate structures for the reactions of  $\text{NH}_3\text{BH}_3$  hydrolysis on  $\text{Co}/\text{Cr}_2\text{O}_3$ .

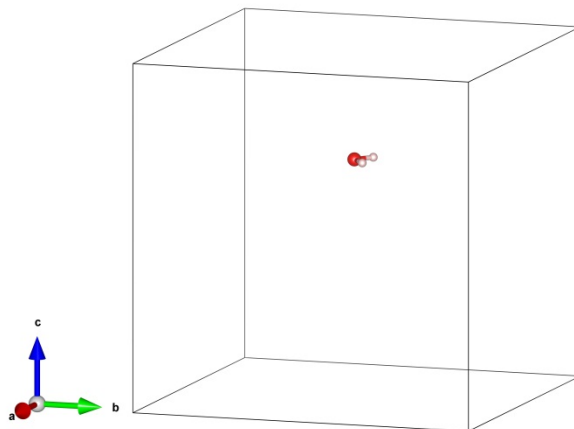

**Fig. S24** Single unit cell of H<sub>2</sub>O

### References

- 1 X. Wang, F. Chen, M. Yang, L. Guo, N. Xie, X. Kou, Y. Song, Q. Wang, Y. Sun and G. Lu, *Sensor. Actuat. B: Chem.*, 2019, **289**, 195–206.
